# Supplementary material for: Synthesis and properties of block copolymers composed of norbornene/higher α-olefin gradient segments using ansa-fluorenylamidodimethyltitanium-[Ph3C][B(C6F5)4] catalyst system
Source: Royal Society of Chemistry journal article supplement (doi:10.1039/d0py01370f), 2020-11-24
Supplement: d0py01370f1.pdf [file d0py01370f1.pdf]

## Supporting information

for

Synthesis and Properties of Block Gradient Copolymers Composed of Norbornene and Higher  $\alpha$ -Olefins Using *ansa*-Fluorenylamidodimethyltitanium- $[\text{Ph}_3\text{C}][\text{B}(\text{C}_6\text{F}_5)_4]$  Catalyst System

by

Haobo Yuan<sup>†</sup>, Takumitsu Kida<sup>†</sup>, Ryo Tanaka<sup>†</sup>, Zhengguo Cai<sup>‡</sup>, Yuushou Nakayama<sup>†</sup>, Takeshi Shiono<sup>\*†</sup>

<sup>†</sup>Graduate School of Engineering, Hiroshima University, Kagamiyama 1-4-1, Higashi-Hiroshima 739-8527, Japan

<sup>‡</sup>State Key Laboratory for Modification of Chemical Fibers and Polymer Materials, College of Materials Science and Engineering, Donghua University, Shanghai 201620, People's Republic of China

### Contents

|    |                                                                                               |    |
|----|-----------------------------------------------------------------------------------------------|----|
| 1. | GPC curves of NB/O and NB/Do pseudo-random copolymers.....                                    | 2  |
| 2. | Weight fractions of NB/ $\alpha$ -olefin block copolymers in obtained post polymers.....      | 3  |
| 3. | Visible light transmittance curves of diblock- and triblock-gradient NB/O copolymer films ... | 4  |
| 4. | TGA and DSC curves of NB/ $\alpha$ -olefin copolymers .....                                   | 5  |
| 5. | One-dimensional SAXS results of NB/O copolymer films .....                                    | 6  |
| 6. | SPM images of gradient and block NB/O copolymer films.....                                    | 7  |
| 7. | Elongation test results of NB/ $\alpha$ -olefin copolymer films before annealing .....        | 8  |
| 8. | Temperature dependences of tangent delta of NB/O block copolymers.....                        | 10 |

## 1. GPC curves of NB/O and NB/Do pseudo-random copolymers

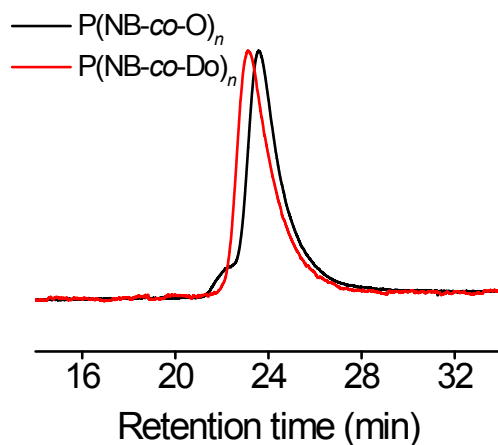

**Fig. S1** GPC curves of NB/O and NB/Do pseudo-random copolymers

The shoulder peak in GPC curve of P(NB-co-O)<sub>n</sub> was an experimental error caused by manual monomer dropping operation during copolymerization.

## 2. Weight fractions of NB/ $\alpha$ -olefin block copolymers in obtained post polymers

The weight fractions of NB/O and NB/Do block copolymers in the obtained post polymers were calculated from their integral areas of the corresponding peaks in GPC curves. Each GPC curve was fitted with a sum of Gaussian functions using Igor Pro 8 software. The fitting error of the peak area was less than  $\pm 2.5\%$ .

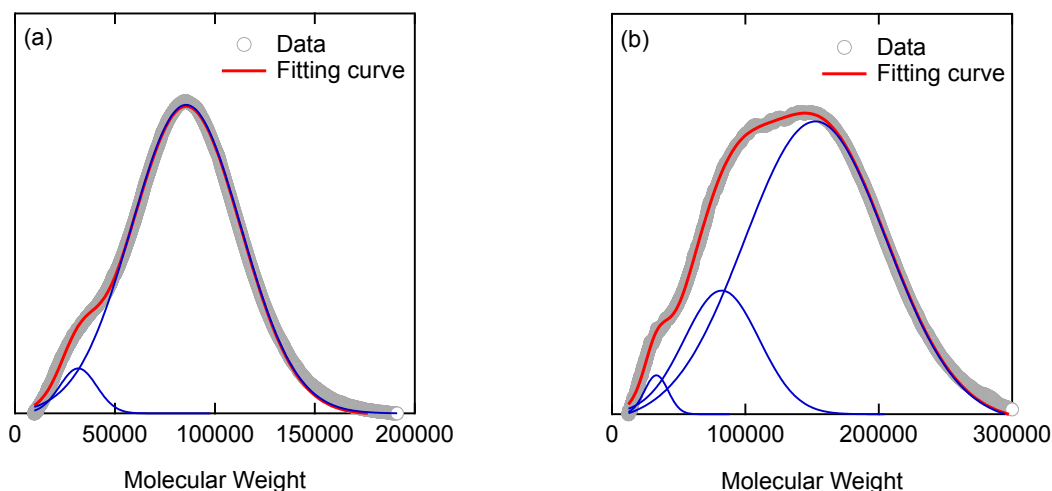

**Fig. S2** Fitting results of molecular weight distribution curves of P(NB-co-O)<sub>2</sub>-1 (a) and P(NB-co-O)<sub>3</sub>-1 (b). The red line represents the fitting curve from a sum of Gaussian functions (blue lines).

**Table S1** Weight fractions of NB/ $\alpha$ -olefin block copolymers in obtained post polymers

| sample                     | Gradient content (wt.%) | Diblock content (wt.%) | Triblock content (wt.%) |
|----------------------------|-------------------------|------------------------|-------------------------|
| P(NB-co-O) <sub>2</sub> -1 | 12                      | 89                     | –                       |
| P(NB-co-O) <sub>2</sub> -2 | 11                      | 89                     | –                       |
| P(NB-co-O) <sub>2</sub> -3 | 15                      | 85                     | –                       |
| P(NB-co-O) <sub>2</sub> -4 | 17                      | 83                     | –                       |
| P(NB-co-O) <sub>3</sub> -1 | 6                       | 27                     | 68                      |
| P(NB-co-O) <sub>3</sub> -2 | 6                       | 25                     | 69                      |
| P(NB-co-Do) <sub>2</sub>   | 17                      | 83                     | –                       |

Determined from the relative peak area of each fraction after converting the x-axis of Fig. S2 to the logarithmic scale.

### 3. Visible light transmittance curves of diblock- and triblock-gradient NB/O copolymer films

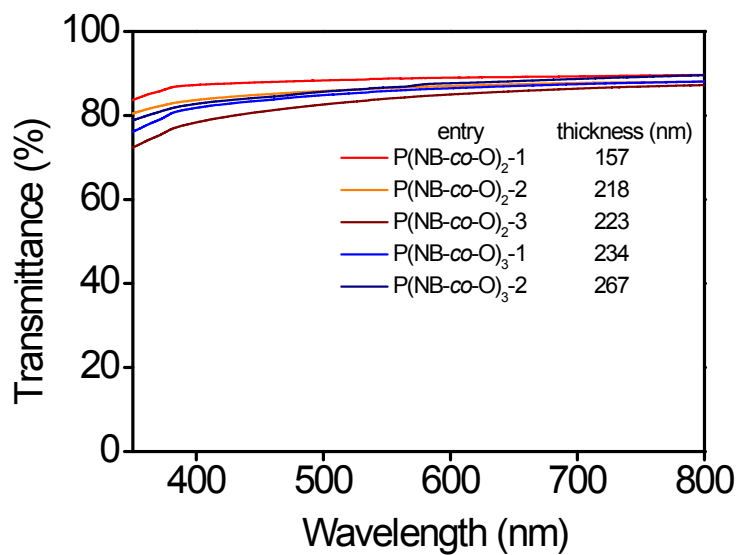

**Fig. S3** Visible light transmittance curves (350 ~ 800 nm) of diblock- and triblock NB/O copolymer films.

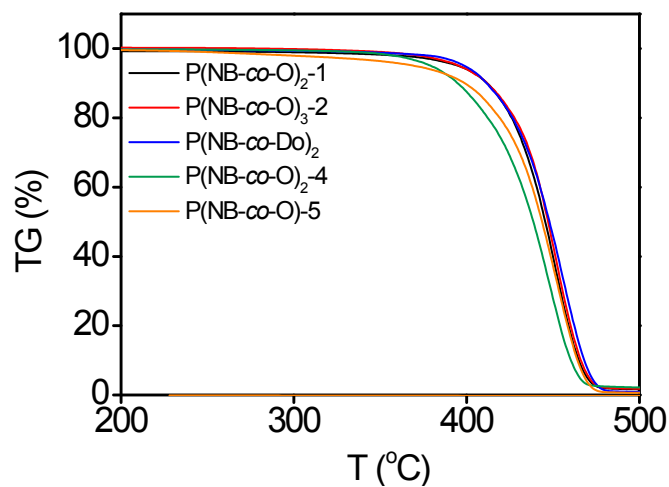

**Fig. S4** TGA curves of NB/ $\alpha$ -olefin copolymers.

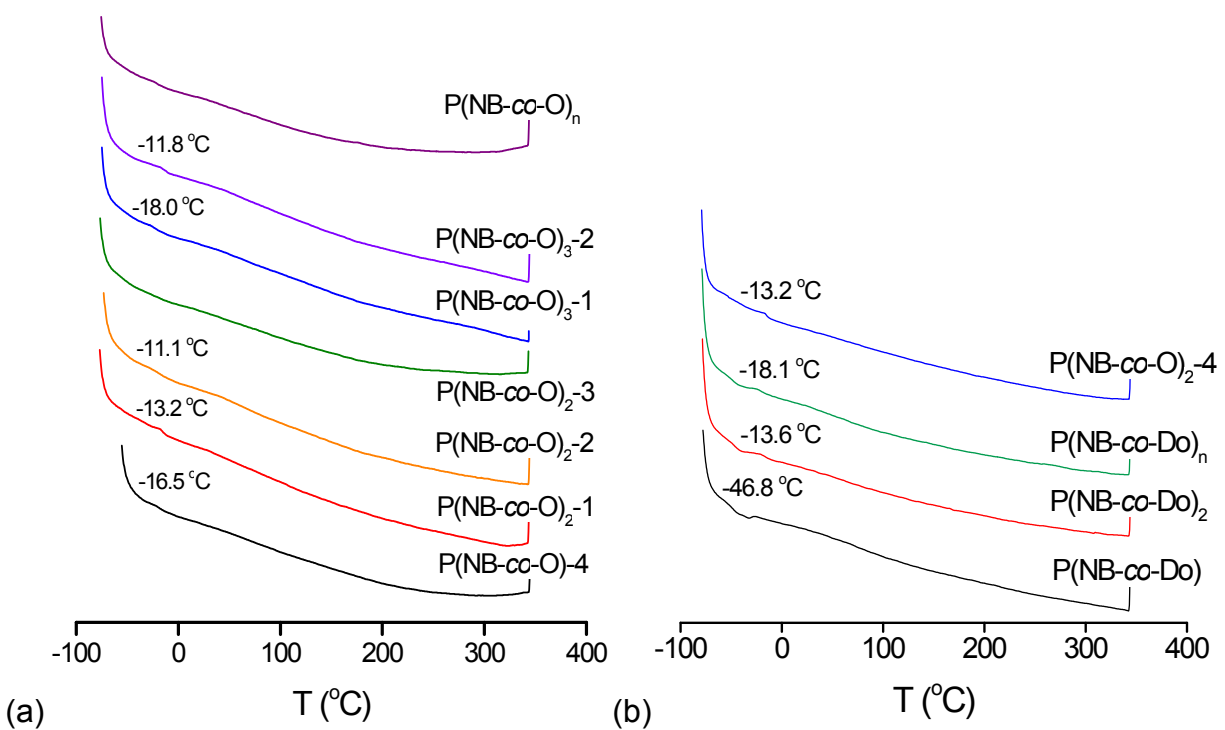

**Fig. S5** DSC curves of NB/ $\alpha$ -olefin copolymers. (a) gradient, di- and triblock NB/O copolymers; (b) gradient, diblock and pseudo-random NB/Do copolymers.

#### 4. TGA and DSC curves of NB/ $\alpha$ -olefin copolymers



## 5. One-dimensional SAXS results of NB/O copolymer films

### Experimental

One-dimensional small-angle X-ray scattering (SAXS) measurements were performed using a Nano-Viewer SAXS system (Rigaku, Japan) with CuK $\alpha$  radiation (40 kV and 30 mA). SAXS patterns were measured using an imaging plate with an exposure time of 30 min.

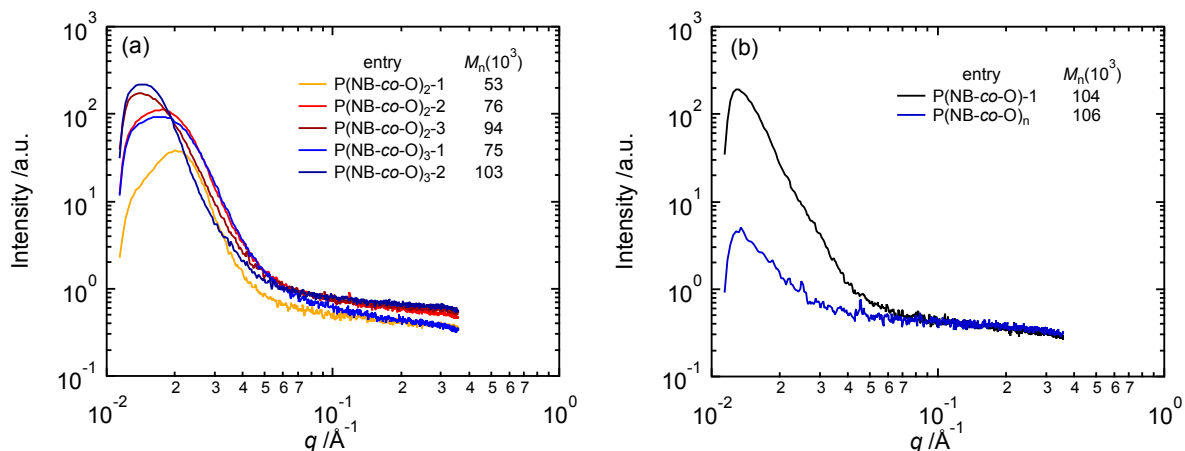

**Fig. S6** One-dimensional SAXS profiles of (a) block copolymers and (b) gradient and pseudo-random NB/O copolymers.

## 6. SPM images of gradient and block NB/O copolymer films

### Experimental

Scanning probe microscope (SPM) measurements were performed on a Dimension Icon SPM system (Bruker, America) with a RTESPA-300 probe using standard peak force quantitative nanomechanical mapping (QNM) mode (in air). The scan size was 3  $\mu\text{m}$ , and the scan rate was 0.5 Hz.

The samples were prepared as followed: The copolymer films made by a melt-pressing procedure were first covered by a two-component epoxy resin adhesive, then the samples were cut from the films by a cryomicrotome under  $-115\text{ }^\circ\text{C}$ .

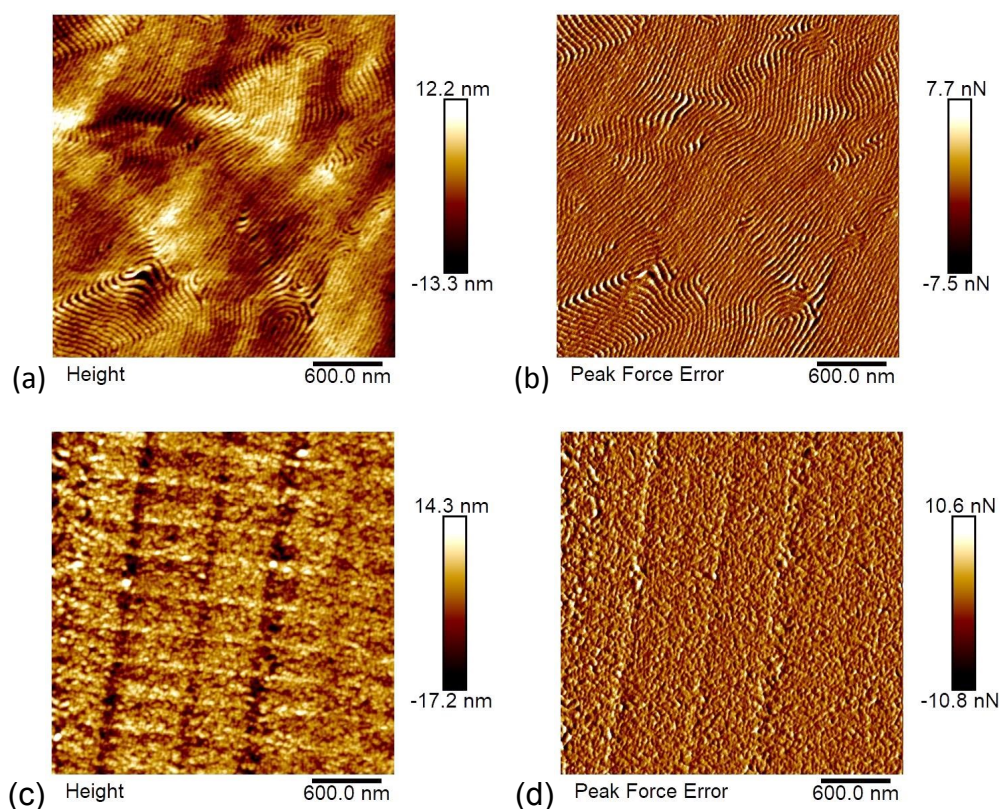

**Fig. S7** SPM images of gradient and block NB/O copolymer films. (a) gradient NB/O copolymer film ( $M_n = 77000$ ,  $\mathcal{D} = 1.18$ ), height image; (b) gradient NB/O copolymer film, peak force error image; (c) gradient-block NB/O copolymer film ( $M_n = 73000$ ,  $\mathcal{D} = 1.44$ ), height image; (b) gradient-block NB/O copolymer film, peak force error image.



## 7. Elongation test results of NB/ $\alpha$ -olefin copolymer films before

**Table S2.** Elongation test results of NB/ $\alpha$ -olefin copolymer films before annealing

| Sample                              | $M_n^a$<br>(kg/mol) | Young<br>modulus <sup>b</sup><br>(MPa) | strength <sup>b</sup><br>(MPa) | strain at break <sup>b</sup> |
|-------------------------------------|---------------------|----------------------------------------|--------------------------------|------------------------------|
| P(NB- <i>co</i> -O)-4               | 104                 | 327 ± 14                               | 6.5 ± 0.2                      | 0.03 ± 0.01                  |
| P(NB- <i>co</i> -O) <sub>2</sub> -1 | 53                  | 441 ± 30                               | 17.1 ± 0.2                     | 0.83 ± 0.42                  |
| P(NB- <i>co</i> -O) <sub>2</sub> -2 | 76                  | 358 ± 9                                | 16.2 ± 0.3                     | 0.10 ± 0.01                  |
| P(NB- <i>co</i> -O) <sub>2</sub> -3 | 94                  | 366 ± 5                                | 11.9 ± 1.9                     | 0.06 ± 0.03                  |
| P(NB- <i>co</i> -O) <sub>3</sub> -1 | 75                  | 356 ± 10                               | 16.4 ± 0.1                     | 0.40 ± 0.31                  |
| P(NB- <i>co</i> -O) <sub>3</sub> -2 | 103                 | 335 ± 12                               | 13.6 ± 1.5                     | 0.06 ± 0.01                  |
| P(NB- <i>co</i> -O) <sub>n</sub>    | 106                 | 766 ± 5                                | 21.8 ± 1.6                     | 0.04 ± 0.01                  |
| P(NB- <i>co</i> -O)-3               | 141                 | 312 ± 3                                | 9.7 ± 0.3                      | 0.11 ± 0.05                  |
| P(NB- <i>co</i> -O) <sub>2</sub> -4 | 125                 | 239 ± 6                                | 10.0 ± 1.2                     | 1.13 ± 0.05                  |
| P(NB- <i>co</i> -Do)                | 124                 | 158 ± 15                               | 4.8 ± 0.2                      | 0.22 ± 0.10                  |
| P(NB- <i>co</i> -Do) <sub>2</sub>   | 114                 | 77 ± 2                                 | 7.5 ± 0.1                      | 2.85 ± 0.15                  |
| P(NB- <i>co</i> -Do) <sub>n</sub>   | 129                 | 151 ± 3                                | 6.1 ± 0.4                      | 0.06 ± 0.02                  |

<sup>a</sup> Determined by GPC (THF; 40 °C; polystyrene standards). <sup>b</sup> Determined by elongation test.

**annealing**

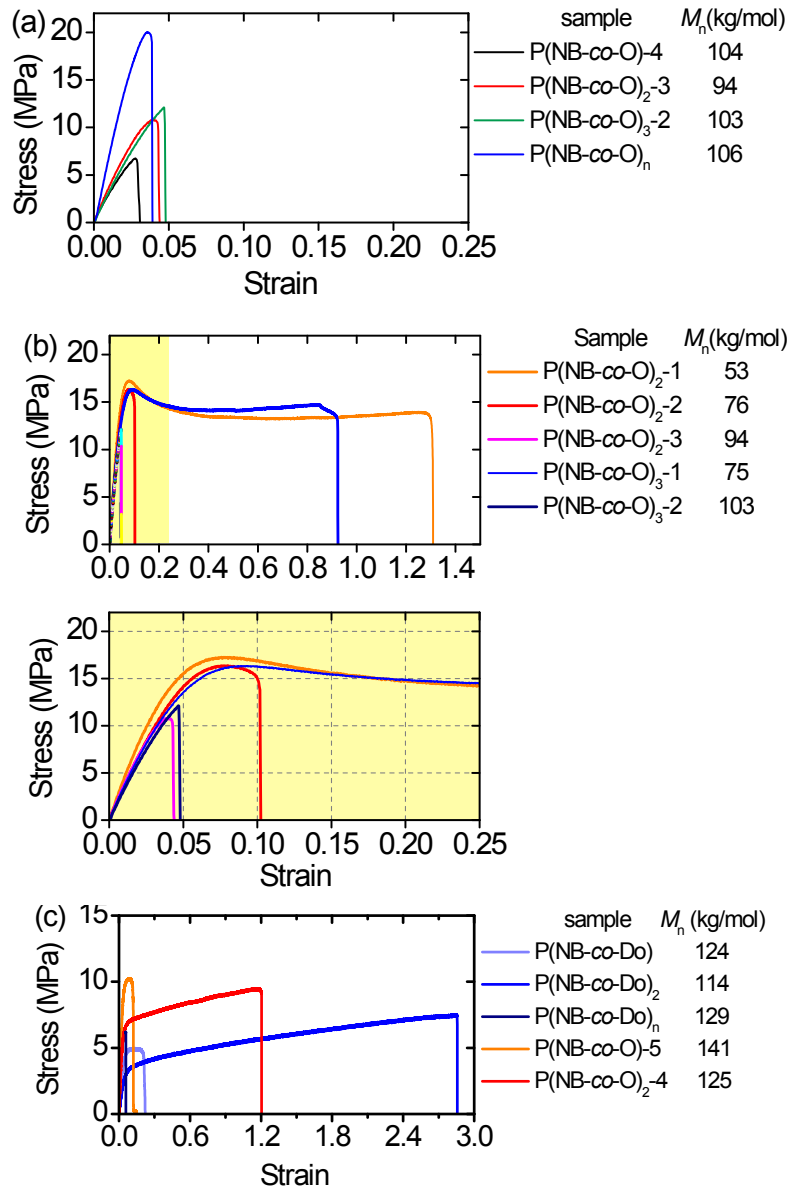

**Fig. S8** Stress-strain curves of NB/ $\alpha$ -olefin copolymer films prepared without annealing procedure. (a) gradient, diblock, triblock and pseudo-random NB/O copolymer films. (NB = 50 mol%) (b) diblock and triblock NB/O copolymer films with different block length. (NB = 50 mol%) (c) NB/Do and NB/O copolymer films with the same NB wt.% (NB = 36 wt.%).

## 8. Temperature dependences of tangent delta of NB/O block copolymers

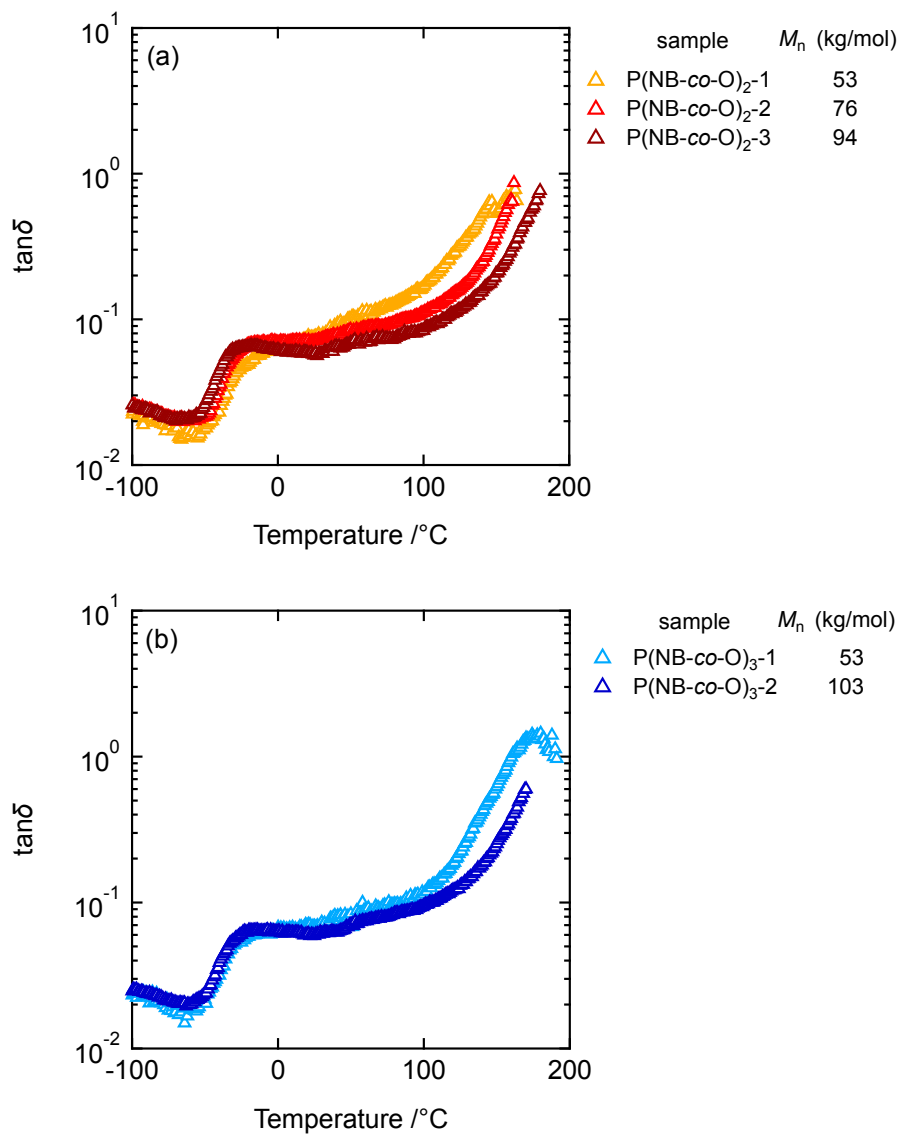

**Fig. S9** Temperature dependences of the tangent delta of (a) diblock and (b) triblock NB/O copolymers
